# Supplementary material for: The Prognostic Value of Preoperative Serum Lactate Dehydrogenase (LDH) Levels in Patients Underwent Curative-intent Hepatectomy For Colorectal Liver Metastases: A Two-Center Cohort Study
Source: Research Square preprint supplement (doi:10.21203/rs.3.rs-236654/v1), 2021-02-26
Supplement: Supplementary file 1 [file 9bdaf88d04b2bc27a342e582.docx]

**Supplementary Table 3.** Univariate and multivariate analyses for predictors of relapse-free survival in the SYSUCC cohort

| **Variables** | **Univariate analysis** | | | **Multivariate analysis** | | | |
| --- | --- | --- | --- | --- | --- | --- | --- |
| **HR (95% CI)** | ***P* value** | | | **HR (95% CI)** | ***P* value** | |
| Age (> 60) | 1.00 (0.78-1.29) | | 0.989 | |  | |  |
| Gender (male) | 1.16 (0.89-1.50) | | 0.270 | |  | |  |
| Primary tumor location |  | |  | |  | |  |
| Right-sided vs. left-sided | 1.03 (0.757-1.407) | | 0.840 | |  | |  |
| Rectum vs. colon | 0.95(0.716-1.259) | | 0.719 | |  | |  |
| Poor differentiation | 1.10 (0.83-1.46) | | 0.494 | |  | |  |
| T stage (T4) | 1.11 (0.86-1.45) | | 0.420 | |  | |  |
| Lymph node metastases | **1.73 (1.32-2.28)** | | **<.001** | | **1.76 (1.33-2.32)** | | **<.001** |
| Perioperative chemotherapy | **1.43 (1.00-2.05)** | | **0.048** | | 1.35 (0.93-1.95) | | 0.113 |
| Preoperative CEA (> 200ng/ml) | 1.18 (0.72-1.94) | | 0.508 | |  | |  |
| Metachronous CRLM | 0.98 (0.75-1.28) | | 0.874 | |  | |  |
| Number of liver metastases  (> 1) | **2.04 (1.58-2.63)** | | **<.001** | | **1.82 (1.39-2.37)** | | **<.001** |
| Largest metastasis (> 5cm) | **2.07 (1.50-2.86)** | | **<.001** | | **1.57 (1.12-2.20)** | | **0.033** |
| Extrahepatic disease | **1.82 (1.29-2.57)** | | **0.001** | | **1.68 (1.18-2.39)** | | **0.004** |
| LDH level (above ULN) | **2.11 (1.54-2.89)** | | **<.001** | | **1.84 (1.31-2.57)** | | **0.001** |

Abbreviations: HR, hazard ratio; CI, confidence interval; CRLM, colorectal liver metastases; ULN, upper limit of normal.
